# Supplementary material for: Targeted mitochondrial therapy using MitoQ shows equivalent renoprotection to angiotensin converting enzyme inhibition but no combined synergy in diabetes
Source: PubMed Central journal article supplement (PMC5680236; doi:10.1038/s41598-017-15589-x), 2017-11-09
Supplement: 41598_2017_15589_MOESM1_ESM.pdf [file 41598_2017_15589_MOESM1_ESM.pdf]

## Online Supplemental Material – SREP-17-29123A

Targeted mitochondrial therapy using MitoQ shows equivalent renoprotection to angiotensin converting enzyme inhibition but no combined synergy in diabetes

Micheal S Ward PhD<sup>#1</sup>, Nicole B Flemming BSc(Hons)<sup>#1,2</sup>, Linda A Gallo PhD<sup>1,2</sup>, Amelia K Fotheringham BSc(Hons)<sup>1,2</sup>, Domenica A McCarthy BSc(Hons)<sup>1</sup>, Aowen Zhuang BBiomed(Hons)<sup>1,3</sup>, Peter H Tang MD<sup>6</sup>, Danielle J Borg PhD<sup>1,2</sup>, Hannah Shaw<sup>1</sup>, Benjamin Harvie<sup>7</sup>, David R Briskey PhD<sup>4</sup>, Llion A Roberts PhD<sup>4</sup>, Manuel R Plan PhD<sup>8</sup>, Michael P Murphy PhD<sup>9</sup>, Mark P Hodson PhD<sup>3,5,8</sup> and Josephine M Forbes PhD<sup>\*1,3,10</sup>

| ID     |      | Control     |             | Diabetes    |             | Diabetes + MitoQ |             | Diabetes + Ramipril |             | Diabetes + Combination |             |
|--------|------|-------------|-------------|-------------|-------------|------------------|-------------|---------------------|-------------|------------------------|-------------|
|        |      | Average     | SD          | Average     | SD          | Average          | SD          | Average             | SD          | Average                | SD          |
| AAA_1  | ASP  | 41.51675899 | 18.05861804 | 35.69960941 | 9.569456002 | 24.30426841      | 8.75221797  | 20.64294603         | 13.57033756 | 23.16702858            | 5.602214931 |
| AAA_2  | GLU  | 207.0709556 | 98.41805684 | 186.7725908 | 38.00384243 | 164.480947       | 48.54422131 | 168.3399415         | 62.93509829 | 201.2937824            | 46.33583574 |
| AAA_3  | CYS  | 72.11448545 | 33.61233026 | 37.31596974 | 14.36402273 | 41.92742347      | 14.29537677 | 50.31695116         | 25.09710155 | 39.84655274            | 19.36624975 |
| AAA_4  | ASN  | 2.280953611 | 0.850078238 | 2.234280819 | 1.503330246 | 2.086862281      | 0.489342757 | 2.25721686          | 0.966671958 | 2.792360279            | 1.853689088 |
| AAA_5  | SER  | 12.18004033 | 2.728690358 | 11.5822     | 3.011012147 | 10.96853488      | 1.996489837 | 10.61892764         | 3.366716981 | 12.35869001            | 4.86088752  |
| AAA_6  | GLN  | 38.26135334 | 18.19566684 | 26.82677372 | 8.787964002 | 21.28060592      | 3.419175149 | 23.64049727         | 12.13673876 | 29.46524408            | 8.197591924 |
| AAA_7  | HIS  | 4.372518387 | 1.501523213 | 4.310708788 | 0.983474683 | 3.641696229      | 0.663985375 | 3.713383689         | 1.255410787 | 4.442209104            | 2.011386883 |
| AAA_8  | GLY  | 154.2008027 | 45.87338807 | 89.32032264 | 10.69012009 | 94.00318667      | 16.71818868 | 79.26255456         | 43.20829471 | 90.50638649            | 22.45986204 |
| AAA_9  | THR  | 7.653772471 | 2.534215442 | 5.522101452 | 2.701889672 | 5.611224717      | 1.026325    | 6.327873108         | 2.433850332 | 7.08606652             | 3.773984844 |
| AAA_10 | ARG  | 2.479778543 | 0.941274455 | 2.894946336 | 0.982669279 | 2.827668084      | 0.669965586 | 2.990306664         | 0.925183571 | 3.782545346            | 1.657198438 |
| AAA_11 | ALA  | 49.19539793 | 18.45866685 | 54.64760832 | 25.70445301 | 46.10967047      | 13.28009089 | 52.14401625         | 19.21232792 | 63.36995534            | 39.41314259 |
| AAA_12 | TYR  | 4.327212    | 2.367761103 | 3.614965332 | 1.764790387 | 3.870906713      | 1.269387448 | 6.093590221         | 2.346630263 | 5.45933758             | 3.867743479 |
| AAA_13 | VAL  | 7.920195764 | 2.786018063 | 11.21022539 | 4.256361565 | 12.80356884      | 6.866504649 | 12.61074125         | 4.981724931 | 13.57809182            | 7.723444236 |
| AAA_14 | MET  | 1.989360774 | 0.950997171 | 1.215198875 | 0.721107007 | 1.48513185       | 0.454337914 | 1.628929967         | 0.728180962 | 1.873142721            | 1.231679563 |
| AAA_15 | TRP  | 1.206675509 | 0.559242493 | 1.20934052  | 0.255103086 | 1.367379514      | 0.412210628 | 1.739011826         | 0.579676146 | 1.777776776            | 1.002096258 |
| AAA_16 | PHE  | 3.546153048 | 1.30662199  | 3.373317205 | 0.731263335 | 3.492850059      | 0.515039758 | 3.870246765         | 1.17080875  | 4.638043865            | 2.53375725  |
| AAA_17 | ILE  | 2.914900921 | 1.280468709 | 4.043053628 | 1.519788725 | 4.995647619      | 2.854562051 | 4.605151604         | 1.899040395 | 5.082096516            | 2.857253798 |
| AAA_18 | LEU  | 7.401319952 | 2.759955153 | 9.451387537 | 3.639382913 | 10.91594709      | 4.585465225 | 11.14805921         | 3.893771411 | 11.55779973            | 5.91366241  |
| AAA_19 | LYS  | 4.799767159 | 2.231516463 | 3.999690827 | 2.452984963 | 3.493285141      | 0.893532581 | 4.366054624         | 1.898061067 | 5.542155539            | 4.546928042 |
| AAA_20 | PRO  | 3.072808847 | 1.432029652 | 2.346123737 | 1.351784675 | 2.270763763      | 0.724352468 | 3.286065216         | 1.487207555 | 4.095770996            | 4.25315879  |
| CCM_1  | ACO  | 0.226129212 | 0.047436666 | 0.355671581 | 0.061252501 | 0.277377637      | 0.139967337 | 0.28927411          | 0.103860725 | 0.367750292            | 0.167970963 |
| CCM_2  | ACoA | 0.926577572 | 0.189180159 | 1.937450191 | 0.937032632 | 1.526589497      | 1.226336325 | 1.071104131         | 0.758674864 | 1.132439982            | 0.328713279 |
| CCM_3  | ADP  | 24.12345876 | 7.694734571 | 57.85473302 | 15.00600347 | 30.12709367      | 19.53714185 | 25.15759167         | 18.26336883 | 32.75578686            | 16.27788886 |
| CCM_4  | AMP  | 70.40333333 | 22.95208807 | 114.9783333 | 36.03375663 | 95.238           | 46.78991419 | 78.56               | 36.33420613 | 82.426                 | 26.32232285 |
| CCM_5  | ATP  | 4.504582738 | 1.787246177 | 11.7865598  | 2.986847909 | 5.928485121      | 4.378014618 | 4.348678834         | 3.911976228 | 6.222060494            | 4.399367463 |
| CCM_6  | cAMP | 0.028772508 | 0.011444836 | 0.042726958 | 0.009349336 | 0.029284703      | 0.009932457 | 0.02955793          | 0.011737566 | 0.03418348             | 0.004440752 |

|        |        |             |             |             |             |             |             |             |             |             |             |
|--------|--------|-------------|-------------|-------------|-------------|-------------|-------------|-------------|-------------|-------------|-------------|
| CCM_7  | CITISO | 5.106494274 | 1.782530679 | 12.62222238 | 5.40724795  | 11.08281225 | 6.194463321 | 7.039784214 | 4.881663015 | 13.29162683 | 6.217115274 |
| CCM_8  | CMP    | 1.986543062 | 0.680007709 | 3.510500841 | 0.788661825 | 2.970237604 | 0.66168237  | 2.483931536 | 1.045300375 | 2.540309393 | 0.59145784  |
| CCM_9  | CPO4   | 5.0535      | 2.047422648 | 29.545      | 10.65166419 | 14.37948    | 15.34667892 | 10.80676667 | 12.10755274 | 12.8522     | 7.137898444 |
| CCM_10 | DHAP   | 0.507474783 | 0.181779767 | 0.727317429 | 0.168890074 | 0.466114074 | 0.080307271 | 0.740700104 | 0.290279265 | 0.660606255 | 0.310920977 |
| CCM_12 | F6P    | 1.256477197 | 0.322936329 | 4.352422656 | 1.393141722 | 2.293467116 | 1.493982322 | 2.436367526 | 1.501987472 | 3.302028649 | 2.066853431 |
| CCM_13 | FUM    | 8.079484845 | 3.31521535  | 5.9235418   | 3.206150003 | 8.617936397 | 5.293166131 | 9.718295483 | 3.550840708 | 15.07696889 | 6.50694893  |
| CCM_14 | G1P    | 0.084569773 | 0.015545044 | 0.170114097 | 0.040174925 | 0.104840092 | 0.017676669 | 0.173481762 | 0.059646616 | 0.154068863 | 0.042544226 |
| CCM_15 | G6P    | 0.619266365 | 0.159346575 | 1.665884627 | 0.454427437 | 0.840831965 | 0.51842392  | 1.016664464 | 0.529374449 | 0.872487522 | 0.356500797 |
| CCM_16 | GDP    | 3.197213445 | 0.076191845 | 4.30563763  | 0.720435958 | 3.912750045 | 1.327098301 | 3.409530398 | 1.251375266 | 3.608681401 | 0.722535518 |
| CCM_17 | Glycol | 2.301070681 | 0.668305096 | 1.956189689 | 0.810622062 | 1.955708522 | 0.755755239 | 2.952186561 | 0.875410678 | 2.58178391  | 1.175431933 |
| CCM_18 | Glyox  | 4.139529119 | 0.841164728 | 3.08281678  | 0.428887582 | 3.816446124 | 1.543773539 | 2.882125876 | 1.26583302  | 3.746266935 | 0.355209769 |
| CCM_19 | GMP    | 10.41389218 | 2.155036822 | 14.11841566 | 2.911798549 | 12.39176459 | 4.097796887 | 11.53821583 | 3.817341625 | 12.08771929 | 2.153216237 |
| CCM_20 | KGA    | 0.297106819 | 0.143761483 | 1.247095733 | 0.479531169 | 1.215288152 | 0.686496576 | 1.335305001 | 0.603107887 | 1.617267568 | 0.827844557 |
| CCM_21 | LAC    | 1186.528269 | 750.1446225 | 1492.846651 | 500.1151014 | 1616.778218 | 530.5643809 | 2189.263428 | 964.8814153 | 3743.362818 | 4061.075596 |
| CCM_22 | MAL    | 93.94738282 | 39.78718067 | 102.3824262 | 31.02955601 | 121.8333558 | 62.40333068 | 103.9182069 | 40.640877   | 132.5031632 | 26.7244182  |
| CCM_23 | NAD    | 52.46807084 | 14.540193   | 92.25313481 | 19.84397401 | 69.24254618 | 32.65422708 | 63.68234806 | 26.55951214 | 73.07420317 | 17.64055295 |
| CCM_24 | NADH   | 2.613641205 | 0.545409883 | 5.112883571 | 1.75855522  | 4.931952428 | 1.635516926 | 3.547862843 | 1.767286881 | 4.04938541  | 1.390261263 |
| CCM_25 | NADP   | 4.295425999 | 0.805212891 | 8.153924353 | 2.225421385 | 5.188490616 | 2.42535582  | 5.723063203 | 2.38451678  | 5.294209146 | 2.600047577 |
| CCM_26 | PYR    | 1.160180183 | 0.723156501 | 2.118949001 | 0.729301432 | 2.025815254 | 1.183355012 | 2.29258461  | 0.909629312 | 2.384197874 | 0.514667736 |
| CCM_27 | R5P    | 1.07042069  | 0.2273758   | 1.111300025 | 0.198157562 | 1.329904861 | 0.887119735 | 1.108312891 | 0.483872385 | 1.175498965 | 0.076205257 |
| CCM_28 | RL5P   | 0.498282585 | 0.148488923 | 1.049618889 | 0.423014395 | 0.611847302 | 0.326705826 | 0.855131822 | 0.363895176 | 1.035118836 | 0.221518525 |
| CCM_29 | SUC    | 56.64633306 | 40.10892716 | 98.4355953  | 67.43141437 | 81.34693594 | 57.5045354  | 90.17156103 | 50.74292734 | 105.0537274 | 90.2597359  |
| CCM_31 | UDPG   | 10.28938895 | 4.874003481 | 14.31996627 | 1.240134349 | 13.41616232 | 2.661321377 | 12.33234145 | 4.117034689 | 14.19596615 | 0.872610993 |
| CCM_32 | UDPGA  | 6.503743781 | 2.726166309 | 8.255702702 | 3.646450398 | 4.058560512 | 3.231739758 | 6.309697221 | 3.157984353 | 4.873627287 | 3.222977626 |
|        | UDPNA  |             |             |             |             |             |             |             |             |             |             |
| CCM_33 | G      | 7.275489473 | 3.061683812 | 7.930016028 | 1.857409906 | 7.160871432 | 1.530784892 | 6.644040583 | 2.389452535 | 7.388166367 | 1.603264611 |
| CCM_34 | UMP    | 7.751384898 | 3.10455885  | 11.82663647 | 2.240547483 | 10.00798628 | 5.880890959 | 9.335179678 | 4.139278751 | 8.069425392 | 4.660658121 |

**Table S1: Reference matrix of renal cortical metabolites and amino acids.** Non-diabetic *db/m* mice (Control); diabetic *db/db* mice (Diabetes); diabetic *db/db* mice + 0.6 mg/kg/day MitoQ orally (DMitoQ); diabetic *db/db* mice + 3 mg/kg/day Ramipril orally (DRam); diabetic *db/db* mice + Combination therapy (DCoAd); n=6-8/group. Amino acids (AAA) were measured using HPLC. Standard abbreviations are used for amino acids and metabolites. All concentrations are in  $\mu\text{mol/L}$ .

|                              | Control     | Diabetes     | DMitoQ       | DRam         |
|------------------------------|-------------|--------------|--------------|--------------|
| <b>Cortical Tissue</b>       |             |              |              |              |
| Ubiquinol-9 (nM/g)           | 215 ± 80    | 354 ± 166    | 364 ± 97     | 400 ± 194    |
| Ubiquinone-9 (nM/g)          | 231 ± 82    | 434 ± 132    | 424 ± 111    | 394 ± 191    |
| Total Q9 (nM/g)              | 446 ± 44    | 787 ± 133*   | 787 ± 94*    | 794 ± 237*   |
| Ubiquinol-10 (nM/g)          | 33 ± 16     | 31 ± 15      | 30 ± 9       | 32 ± 14      |
| Ubiquinone-10 (nM/g)         | 26 ± 10     | 35 ± 17      | 30 ± 13      | 30 ± 17      |
| Total Q10 (nM/g)             | 59 ± 8      | 66 ± 12      | 60 ± 8       | 62 ± 21      |
| Total Q9:Q10 ratio           | 7.6 ± 0.8   | 12.0 ± 1.5*  | 13.2 ± 1.6*  | 13.4 ± 2.7*  |
| <b>Isolated Mitochondria</b> |             |              |              |              |
| Ubiquinol-9 (nM/g)           | 3313 ± 1787 | 3785 ± 2475  | 3521 ± 2279  | 4378 ± 1991  |
| Ubiquinone-9 (nM/g)          | 5478 ± 963  | 7397 ± 1850  | 8169 ± 2746  | 7167 ± 2111  |
| Total Q9 (nM/g)              | 8791 ± 1953 | 11182 ± 2789 | 11690 ± 4049 | 11545 ± 3142 |
| Ubiquinol-10 (nM/g)          | 420 ± 192   | 348 ± 231    | 316 ± 201    | 398 ± 179    |
| Ubiquinone-10 (nM/g)         | 1071 ± 166  | 875 ± 220    | 893 ± 229    | 799 ± 192    |
| Total Q10 (nM/g)             | 1491 ± 335  | 1223 ± 355   | 1209 ± 364   | 1196 ± 282   |
| Total Q9:Q10 ratio           | 5.9 ± 0.3   | 9.3 ± 0.7*   | 9.6 ± 1.1*   | 9.6 ± 0.7*   |

**Table S2: Renal cortical tissue and isolated mitochondria analyzed by HPLC for oxidized (ubiquinone) and reduced (ubiquinol) coenzyme Q9 and coenzyme Q10 content.** Non-diabetic *db/m* mice + Vehicle (Control); Diabetic *db/db* mice + vehicle (Diabetes); Diabetic *db/db* mice + 0.6 mg/kg/day MitoQ orally (DMitoQ); Diabetic *db/db* mice + 3 mg/kg/day Ramipril orally (DRam); n=4-10/group. FBG – fasting blood glucose; GHb – glycated haemoglobin. Data expressed as Mean±SD.

\**P*<0.05 vs C.
